# Supplementary material
Source: publisher figshare collection journal article supplement (https://acs.figshare.com/ndownloader/files/13762280)
Supplement: Supplementary file 1 [file 13762280]

## Supporting Information

### Ultrathin scale tailoring of anisotropic magnetic coupling and anomalous magneto-resistance in $SrRuO_3 - PrMnO_3$ superlattices

Antarjami Sahoo,<sup>1</sup> Wilfrid Prellier,<sup>2</sup> and Prahallad Padhan<sup>1\*</sup>

<sup>1</sup>*Department of Physics, Indian Institute of Technology Madras, Chennai 600036, India*

<sup>2</sup>*Laboratoire CRISMAT, CNRS UMR 6508, ENSICAEN, 6 Bd du Marechal Juin, F-14050 Caen Cedex, France*

#### AUTHOR INFORMATION :

Corresponding Author :

Padhan@iitm.ac.in

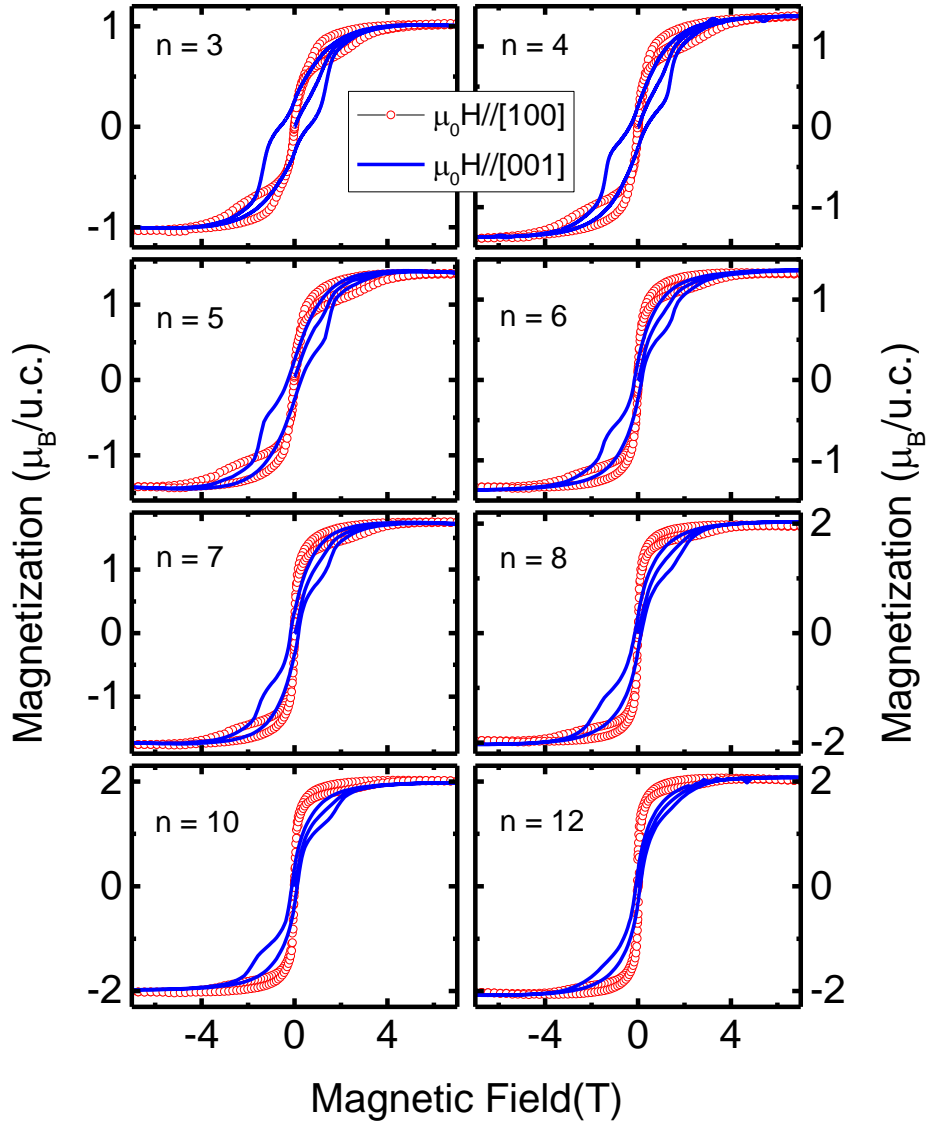

Figure S1: Zero-Field-Cooled field dependent in-plane and out-of-plane magnetization of  $(001)STO/[17 \text{ u.c. } SrRuO_3/n \text{ u.c. } PrMnO_3]_{15}$  superlattices measured at 20 K.

The zero-field-cooled field dependent magnetization of various superlattices with different  $PMO$  space layer measured at 20 K are shown in Figure S1. The magnetization was measured for the field oriented along  $[100]_{PC}$  and  $[001]_{PC}$  directions. All the superlattices exhibit double hysteresis loop.

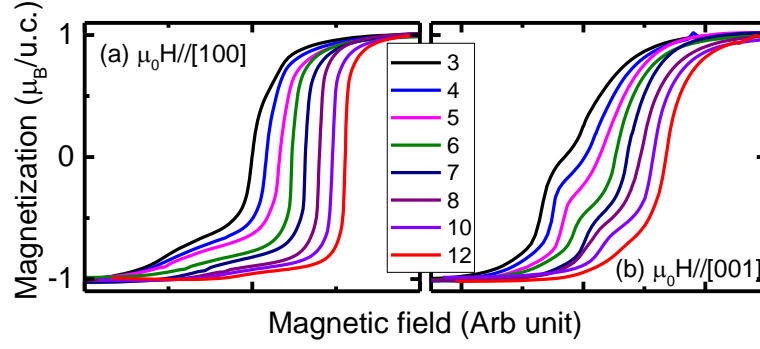

Figure S2: Normalized (a) in-plane and (b) out-of-plane *ZFC* magnetization of the field decreasing branches of the hysteresis loops of various superlattices. The field decreasing branch of each superlattice is shifted along the field axis.

The in-plane and out-of-plane magnetizations shown in Figure S2 are normalized with magnetic moment at highest applied field to get a qualitative insight of the size of the biased layer at the interfaces. The normalized magnetization of the field decreasing branches of the  $M(H)$ s for  $[100]_{PC}$  and  $[001]_{PC}$  orientations of magnetic field are plotted in Figure S2(a) and S2(b), respectively. The origin is shifted along the field axis by  $0.4\text{ T}$  and labelled with the arbitrary unit. The loop opening, which is proportional to the biased *SRO* layer thickness systematically decreases with the increase of *PMO* spacer layer thickness.

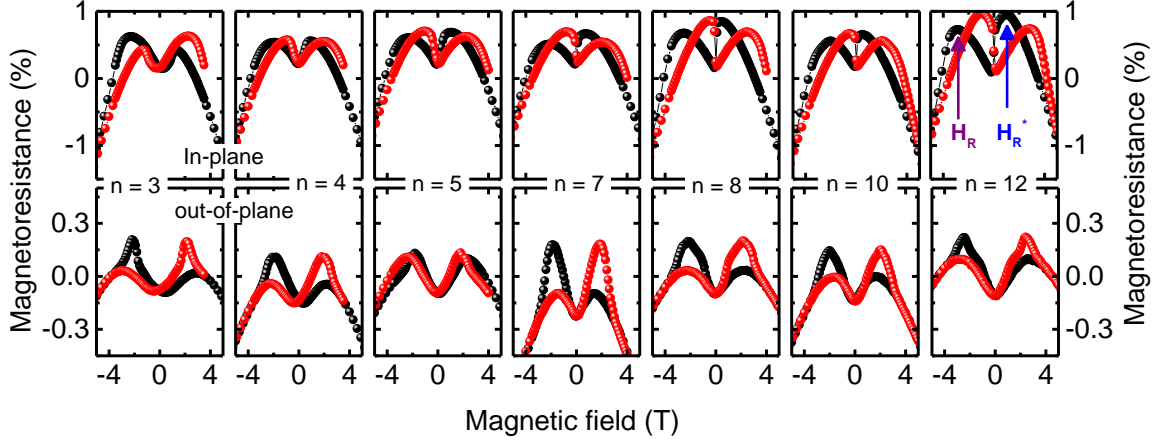

Figure S3: Zero-Field-Cooled field dependent in-plane and out-of-plane magnetoresistance at 20 K of (001)STO/[17 u.c.SrRuO<sub>3</sub>/n u.c.PrMnO<sub>3</sub>]<sub>15</sub> superlattices.

Figure S3 shows the zero-field-cooled (ZFC) field dependent magnetoresistance ( $MR(H) = \frac{R(H)-R(0)}{R(0)}$ ) measured at 20 K for various superlattices with field oriented along  $[100]_{PC}$  and  $[001]_{PC}$  directions. The  $MR$  is negative at 7 T field owing to the spin polarised d-band of  $SRO$  (see Figure 4(c) and 4(d)). As the field decreases below 7 T, the angular separation of the spins of pinned  $SRO$  near the interfaces and free  $SRO$  (see Figure S4) induce additional spin dependent scattering. Thus, it decreases the probability of transport of  $Ru$  4d electrons from one free  $SRO$  to another, which leads to a larger resistance compare to the zero-field resistance, i.e. the  $MR$  changes its sign and becomes positive. On further decreasing the field, the spins of the pinned  $SRO$  layer, influenced by the rotation of  $Mn$  spins because of their exchange coupling nature, start rotating toward the free layer at a field  $H_R^*$ . This decreases the resistance and hence, the  $MR$ . The decrease of in-plane  $MR$  of the superlattices with  $n = 3$  to 6 is steady due to the gradual rotation of spins. While the variation of in-plane  $MR$  of the superlattices with  $n \geq 7$  is faster due to easy spin flipping of biased  $SRO$ . Once the  $Mn$  spins flip, and the free  $SRO$  rotates, the pinned  $SRO$  start inducing the spin dependent scattering and the resistance increases up to the field  $H_R$ . The anomalous behaviour of  $MR$

between  $H_R^*$  and  $H_R$  of the superlattices is mainly determined by (i) electrical conduction of *Ru 4d* electrons in *SRO* and (ii) the probability of transport of *Ru 4d* electrons from one *SRO* layer to another through the *PMO* layer in the presence of magnetic field. The  $H_R$  corresponds to the  $H_C$  of the superlattices, a field at which the Zeeman energy overcomes the exchange coupling energy and the biased *Ru* spins start rotating towards the field direction.

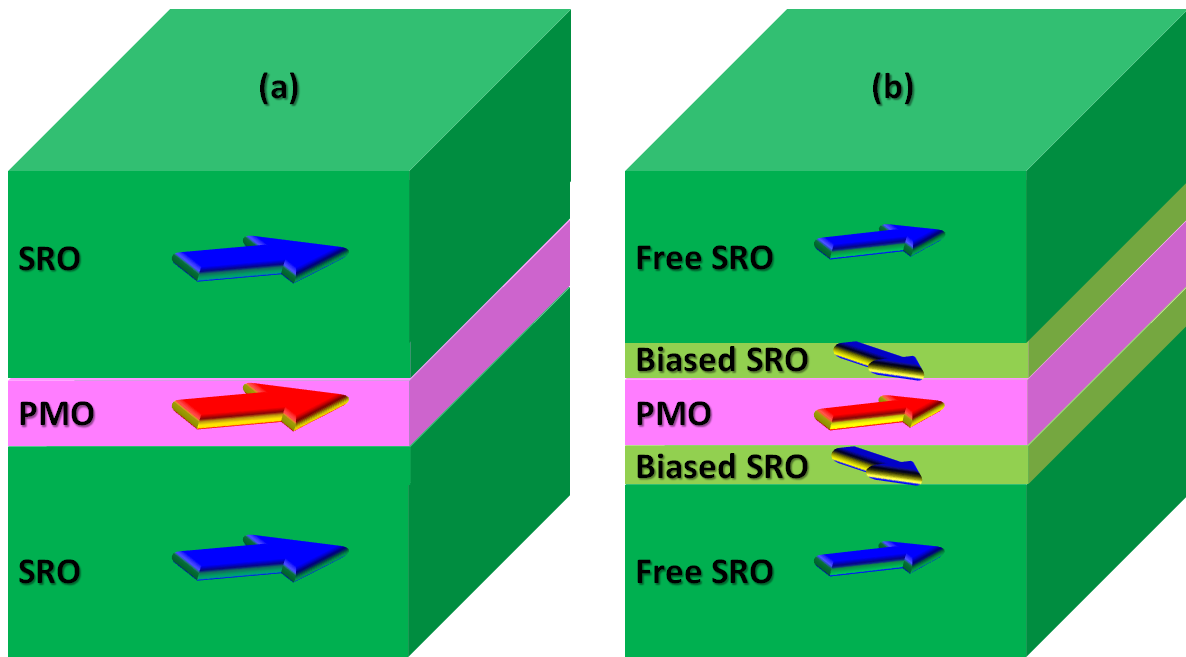

Figure S4 : Schematics of (a) an ideal and (b) an as prepared *SRO – PMO* superlattice, where the arrows indicate the orientation of spins of different layers, created by the in-plane applied field larger than the coercive field of thin film of *SRO*.

As the *SRO* and *PMO* are ferromagnetic, the net spin orientations of each layer in the superlattice for the ideal case (i.e. in the absence of exchange coupling between the layers) is expected to be along the direction of the field (see Figure S4(a)). However, in presence of strong exchange coupling i.e. in the present case, the strong *AFM* coupling at the interfaces, the *SRO* can be visualized as a combination of the interfacial biased part (pinned) and unbiased part (free) (see Figure S4(b)).
